# Supplementary material for: Acidic chloride electrolyte mediates the high conversion ratio of CO2-to-C2H4 and direct production of Cl2
Source: Royal Society of Chemistry journal article supplement (doi:10.1039/d3se01717f), 2024-01-01
Supplement: d3se01717f1.pdf [file d3se01717f1.pdf]

## Supporting Information

Acidic chloride electrolyte mediates the high conversion ratio of CO<sub>2</sub>-to-C<sub>2</sub>H<sub>4</sub>  
and direct production of Cl<sub>2</sub>

Caitao Kang, Chenglong Ding, Yao Li, Yanming Li, Changli Li\*, Jingfu He\*

School of Materials, Shenzhen Campus of Sun Yat-sen University, No. 66, Gongchang Road,  
Guangming District, Shenzhen, Guangdong 518107, P.R. China

\*E-mail: lichli5@mail.sysu.edu.cn; [hejf27@mail.sysu.edu.cn](mailto:hejf27@mail.sysu.edu.cn)

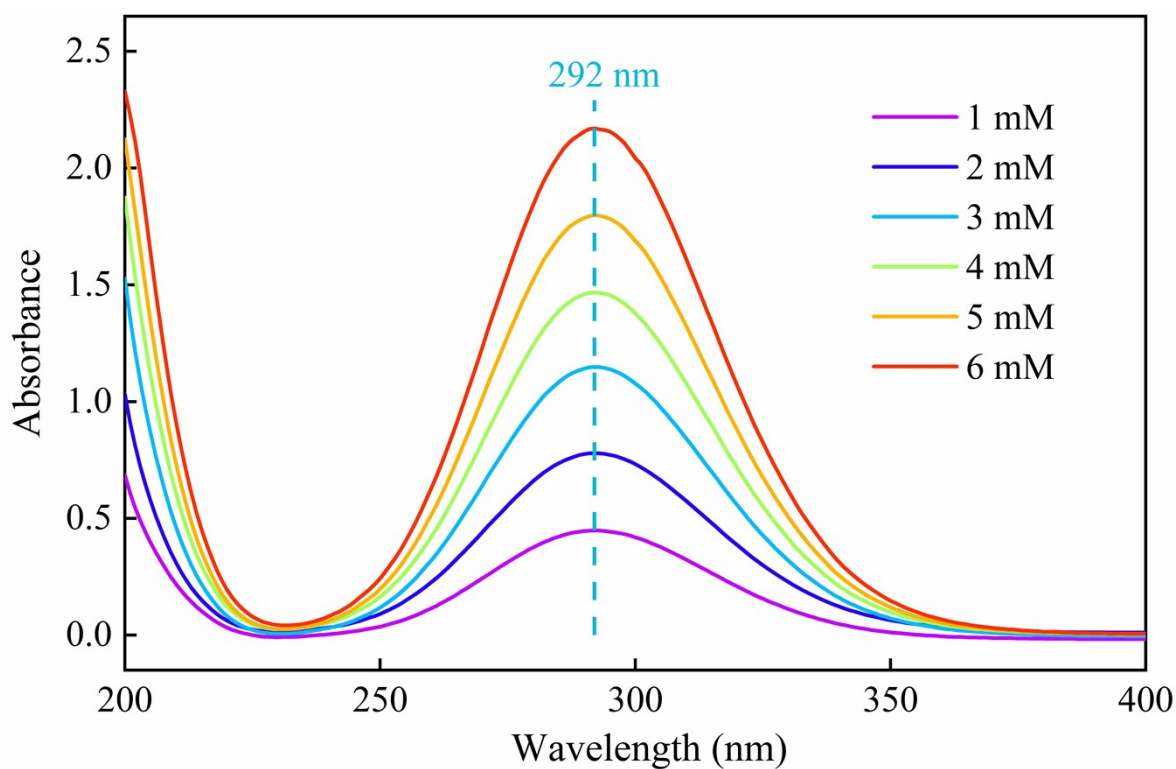

Supplementary Figure 1. The quantification of hypochlorite concentration by UV-vis.

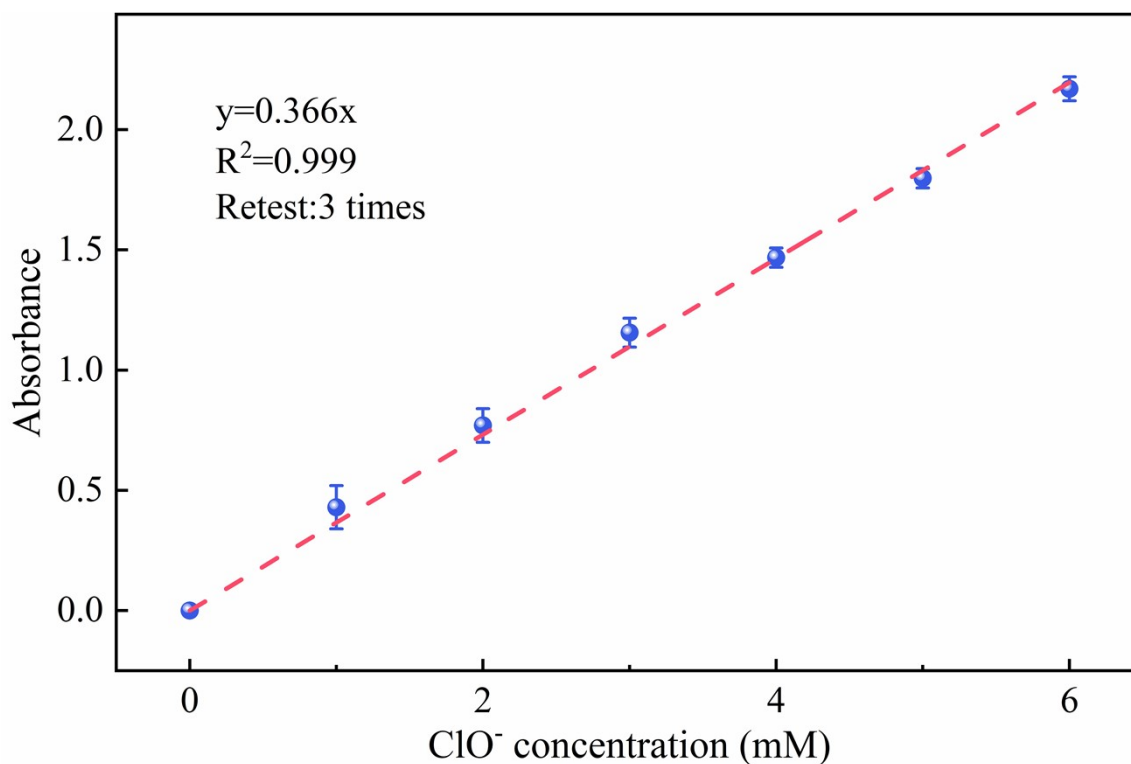

Supplementary Figure 2. ClO<sup>-</sup> standard curve in 1 M KOH with 2 M KCl.

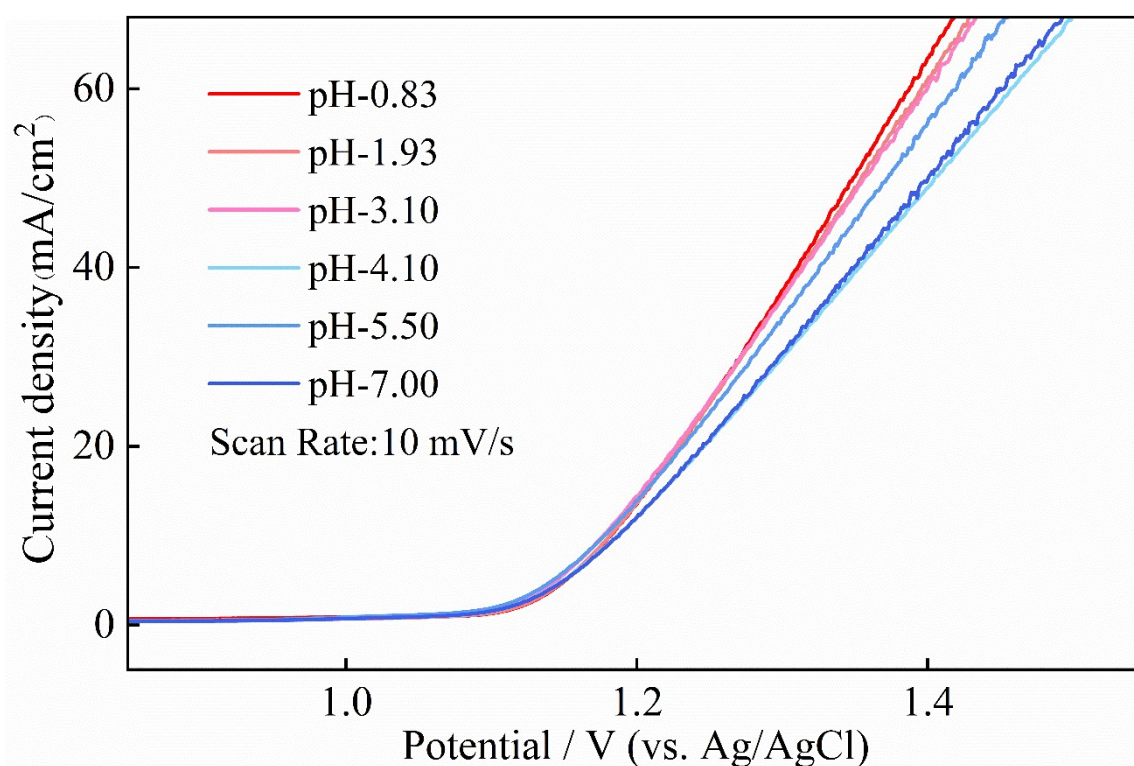

Supplementary Figure 3. Cl<sup>-</sup> oxidation waves observed during linear sweep voltammetry of DSA catalyst in 2 M KCl at different pH.

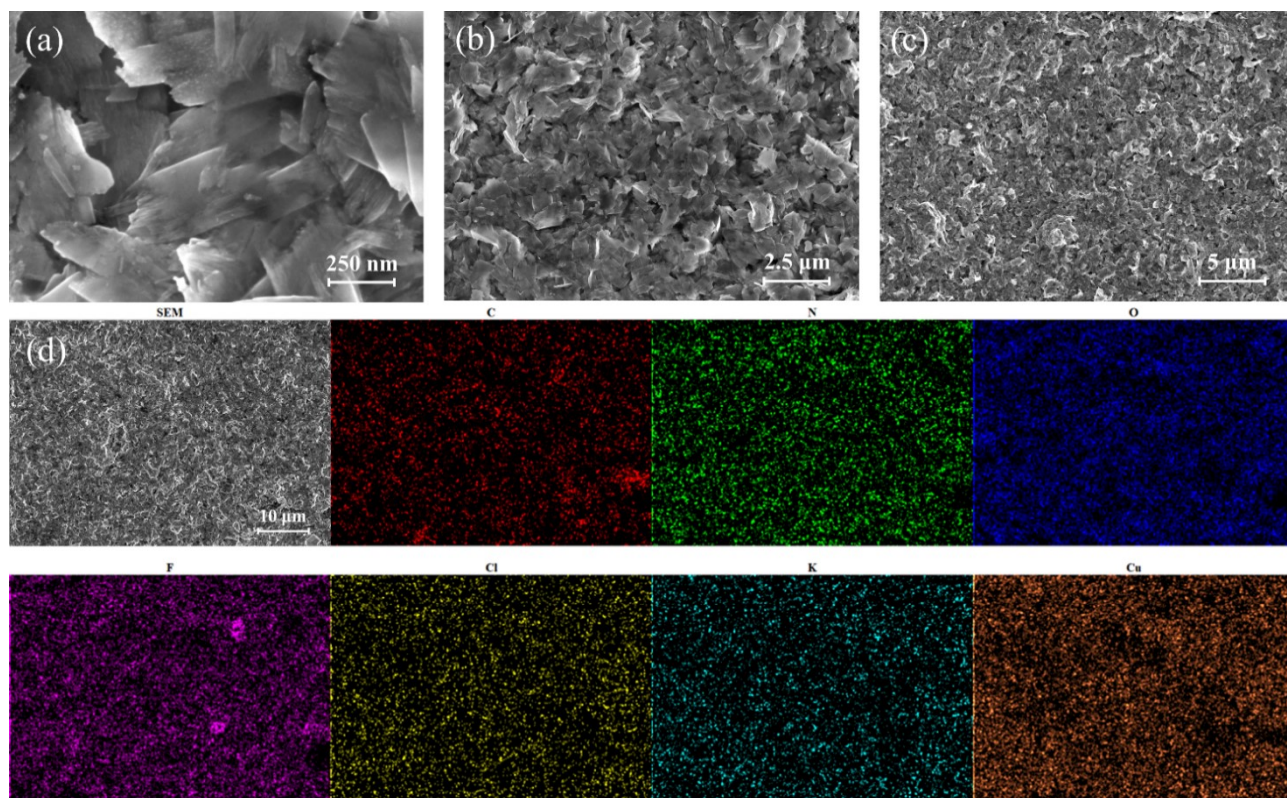

Supplementary Figure 4. Surface morphology and EDS mapping images of CuO catalyst before the reaction.

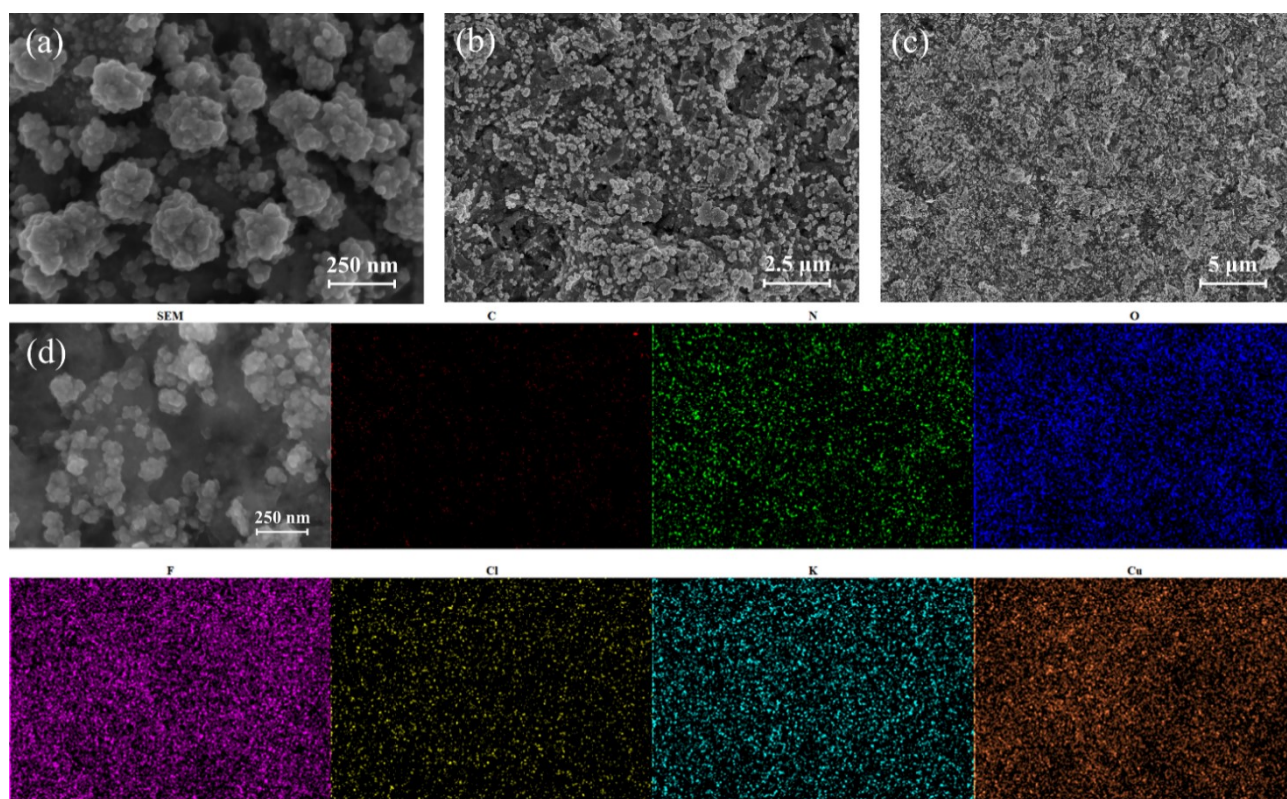

Supplementary Figure 5. Surface morphology and EDS mapping images of CuO catalyst after the reaction.

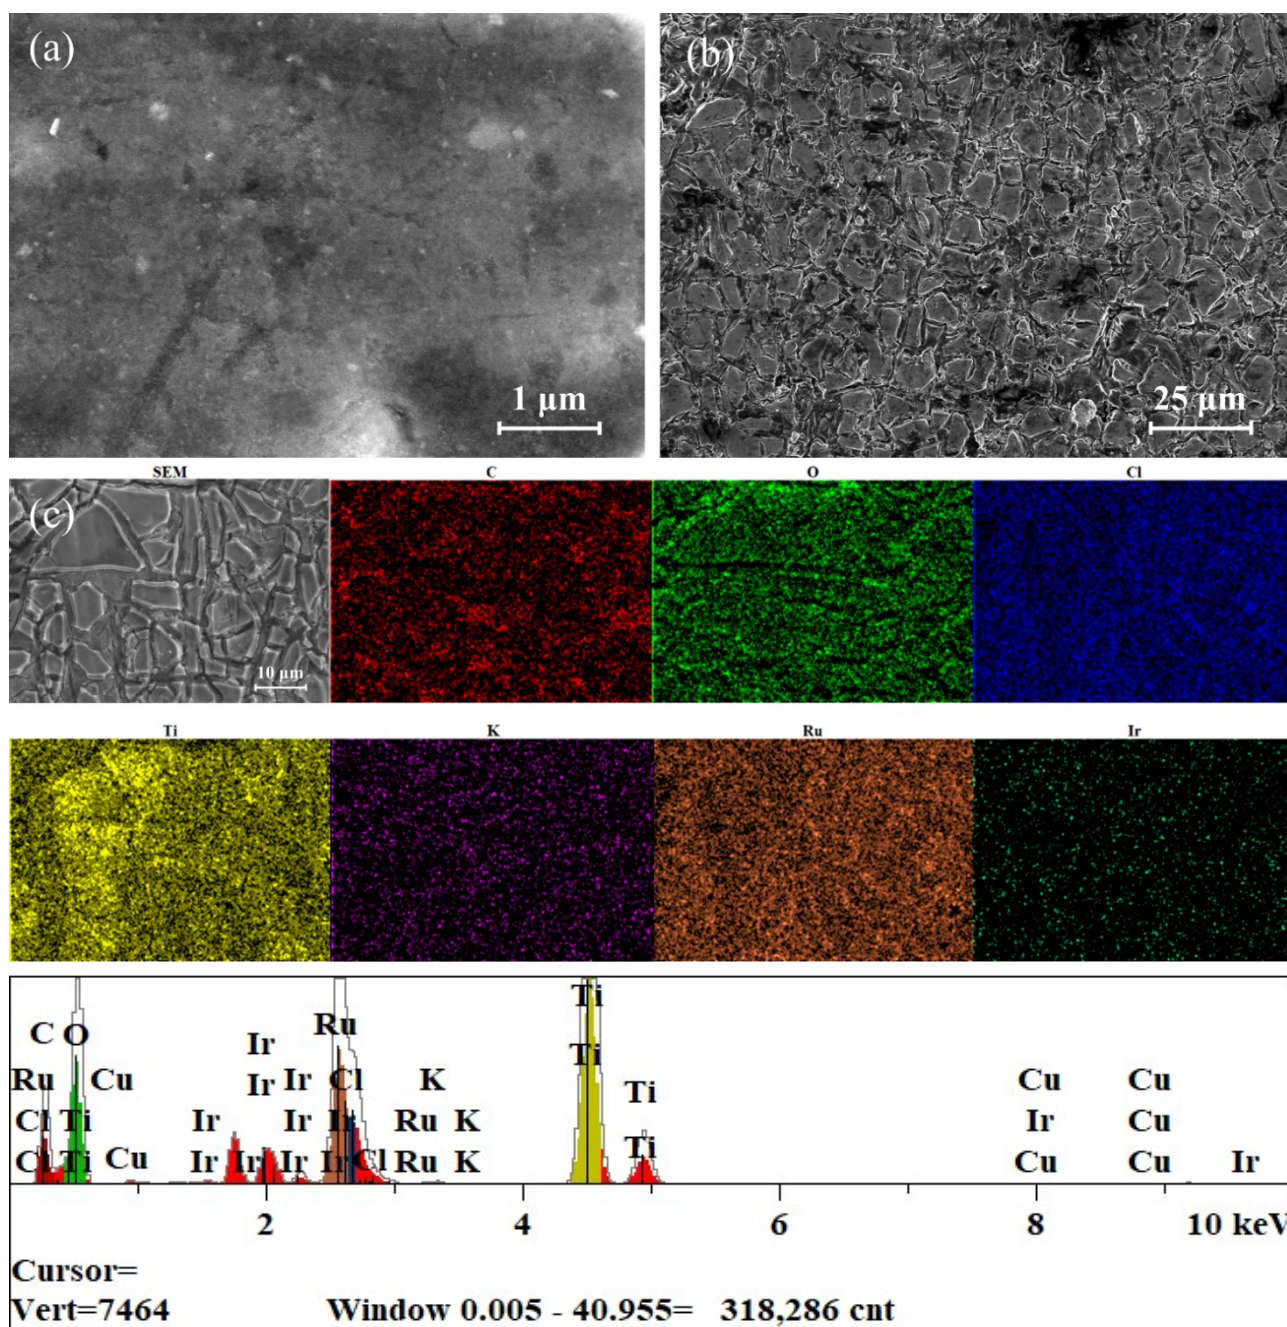

Supplementary Table 1. EDS-area mapping images of DSA catalyst before the reaction.

| Elt. | Intensity (c/s) | Atomic % | Atomic Ratio | Conc.  | Units | Error 2-sig | MDL 3-sig |
|------|-----------------|----------|--------------|--------|-------|-------------|-----------|
| C    | 349.99          | 11.936   | 0.2181       | 4.454  | wt.%  | 0.044       | 0.070     |
| O    | 939.47          | 54.729   | 1.0000       | 27.206 | wt.%  | 0.152       | 0.170     |
| Cl   | 162.65          | 1.023    | 0.0187       | 1.127  | wt.%  | 0.028       | 0.073     |
| K    | 18.77           | 0.142    | 0.0026       | 0.172  | wt.%  | 0.028       | 0.084     |
| Ti   | 2,517.80        | 22.564   | 0.4123       | 33.558 | wt.%  | 0.113       | 0.109     |

|    |          |         |        |         |      |       |       |       |
|----|----------|---------|--------|---------|------|-------|-------|-------|
| Ru | 1,237.29 | 8.114   | 0.1483 | 25.480  | wt.% | 0.136 | 0.221 |       |
| Ir | 12.85    | 1.265   | 0.0231 | 7.552   | wt.% | 1.002 | 2.888 |       |
|    |          | 100.000 |        | 100.000 | Wt.% |       |       | Total |

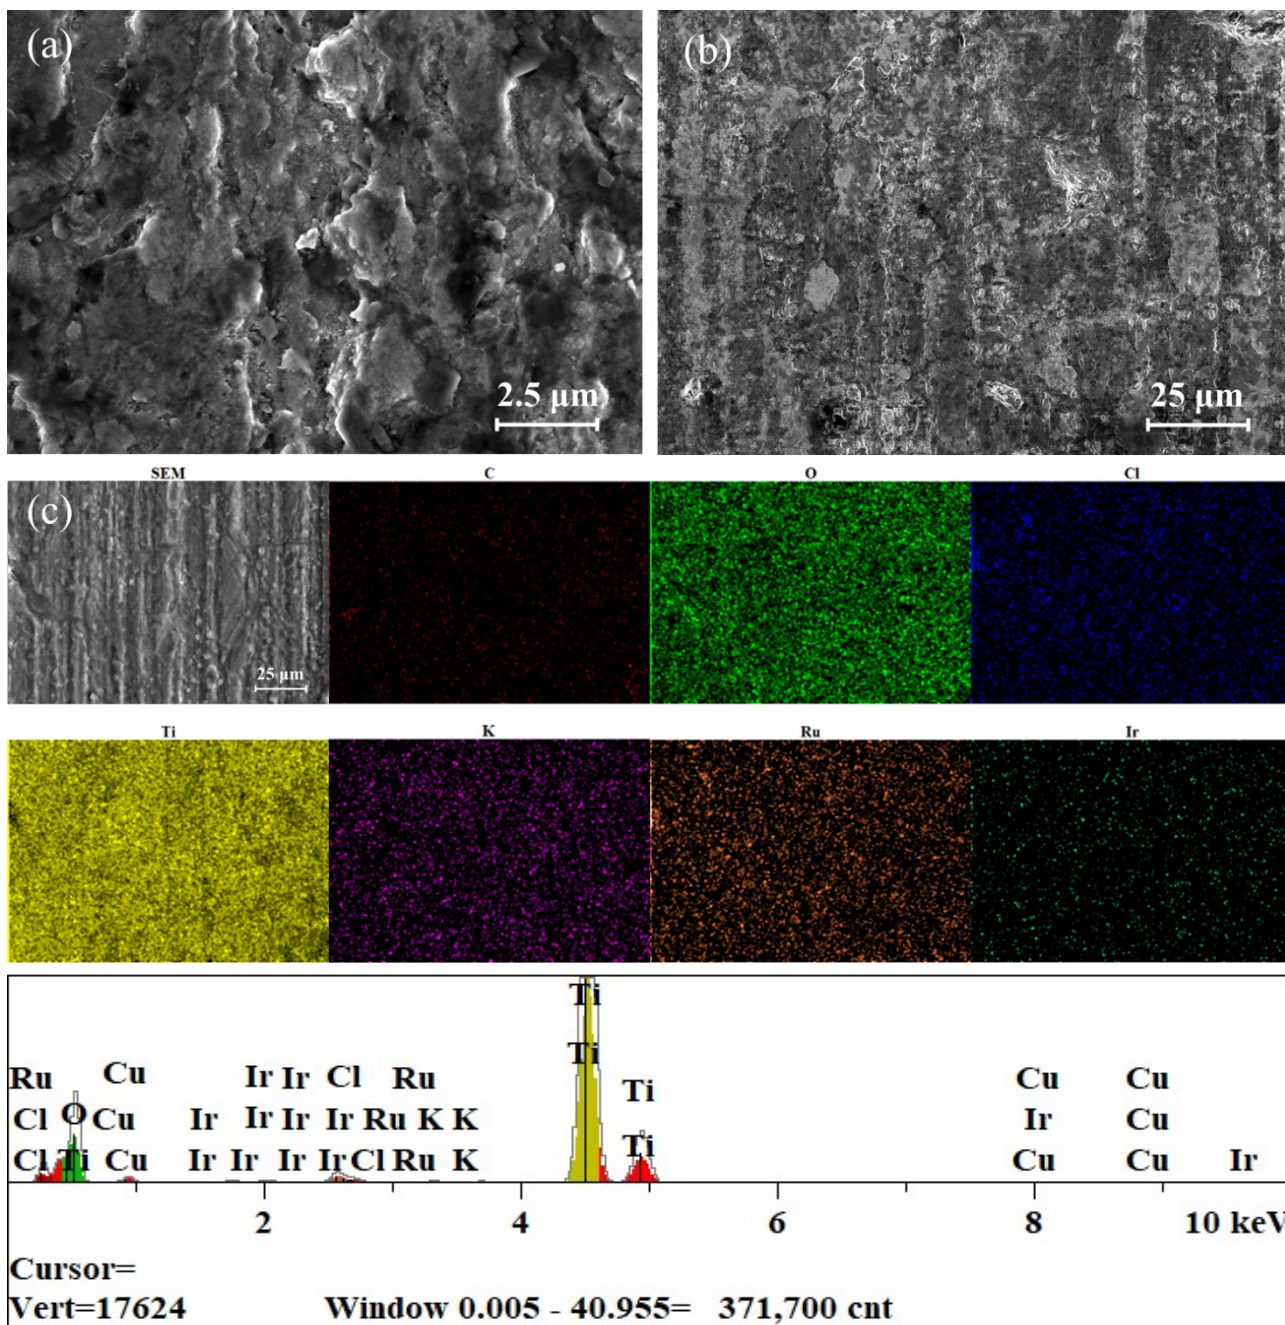

Supplementary Table 2. EDS-area mapping images of DSA catalyst after the reaction.

| Elt. | Intensity (c/s) | Atomic % | Atomic Ratio | Conc. | Units | Error 2-sig | MDL 3-sig |  |
|------|-----------------|----------|--------------|-------|-------|-------------|-----------|--|
| C    | 185.82          | 5.437    | 0.1008       | 2.199 | wt.%  | 0.033       | 0.065     |  |

|    |          |         |        |         |      |       |       |       |
|----|----------|---------|--------|---------|------|-------|-------|-------|
| O  | 834.80   | 53.930  | 1.0000 | 29.061  | wt.% | 0.174 | 0.202 |       |
| Cl | 34.91    | 0.161   | 0.0030 | 0.192   | wt.% | 0.020 | 0.058 |       |
| K  | 38.18    | 0.177   | 0.0033 | 0.233   | wt.% | 0.020 | 0.057 |       |
| Ti | 5,918.76 | 38.748  | 0.7185 | 62.467  | wt.% | 0.133 | 0.088 |       |
| Ru | 118.71   | 0.445   | 0.0083 | 1.516   | wt.% | 0.049 | 0.135 |       |
| Ir | 5.84     | 0.455   | 0.0084 | 2.946   | wt.% | 0.813 | 2.417 |       |
|    |          | 100.000 |        | 100.000 | Wt.% |       |       | Total |

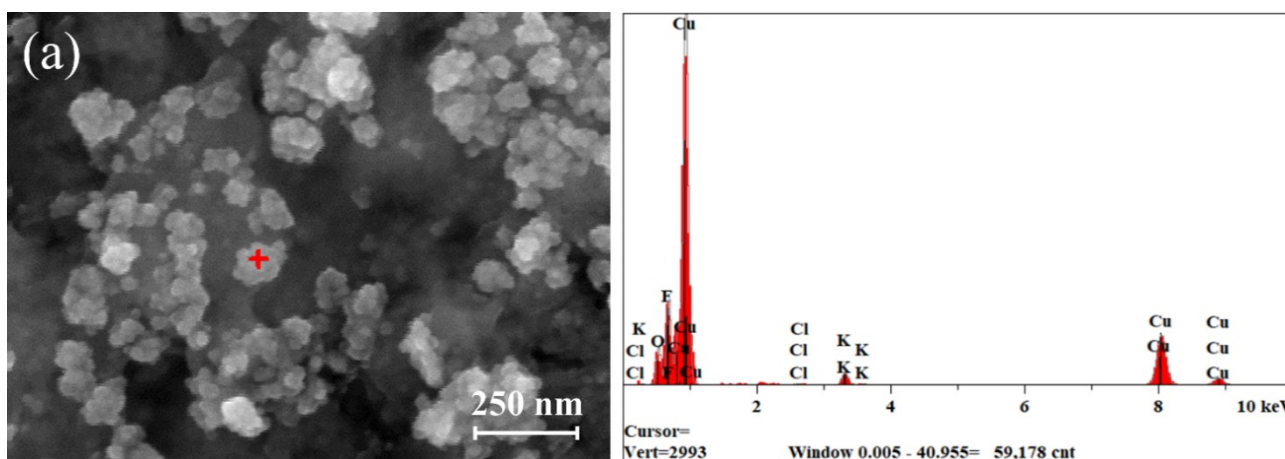

Supplementary Figure 8. Surface morphology and EDS-point mapping images of CuO catalyst after the reaction.

Supplementary Table 3. EDS-spot mapping images of CuO catalyst after the reaction.

| Elt. | Intensity (c/s) | Atomic % | Atomic Ratio | Conc.   | Units | Error 2-sig | MDL 3-sig |       |
|------|-----------------|----------|--------------|---------|-------|-------------|-----------|-------|
| C    | 3.83            | 2.602    | 0.1442       | 0.766   | wt.%  | 0.676       | 1.014     |       |
| N    | 1.46            | 0.862    | 0.0478       | 0.296   | wt.%  | 0.507       | 0.766     |       |
| O    | 81.39           | 18.044   | 1.0000       | 7.074   | wt.%  | 0.355       | 0.352     |       |
| F    | 185.17          | 26.517   | 1.4695       | 12.344  | wt.%  | 0.357       | 0.264     |       |
| Cl   | 3.81            | 0.226    | 0.0125       | 0.197   | wt.%  | 0.119       | 0.173     |       |
| K    | 35.43           | 2.094    | 0.1160       | 2.006   | wt.%  | 0.166       | 0.183     |       |
| Cu   | 207.27          | 49.656   | 2.7519       | 77.318  | wt.%  | 1.912       | 0.752     |       |
|      |                 | 100.000  |              | 100.000 | Wt.%  |             |           | Total |

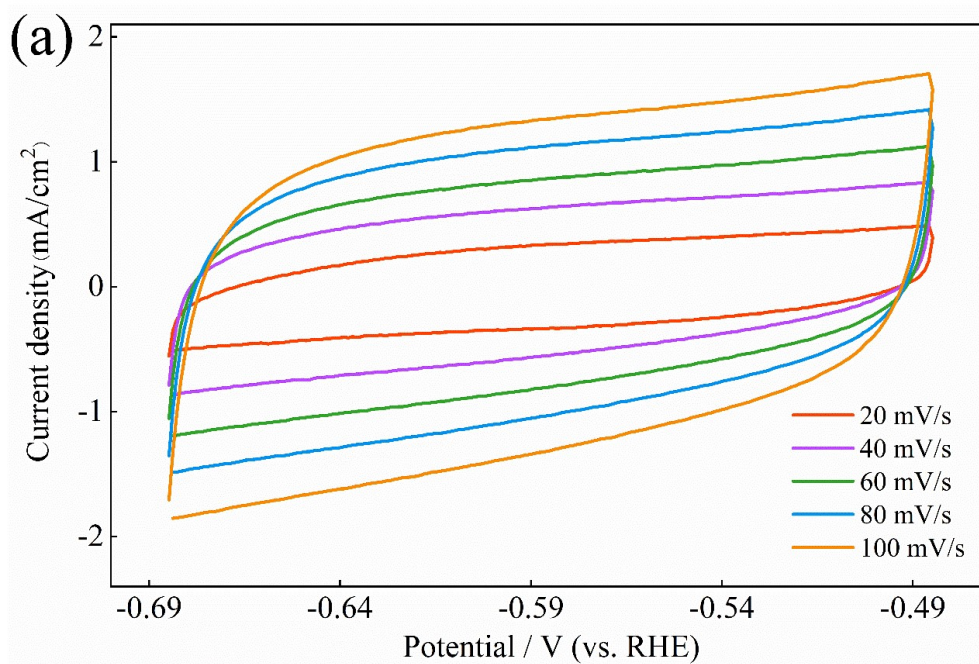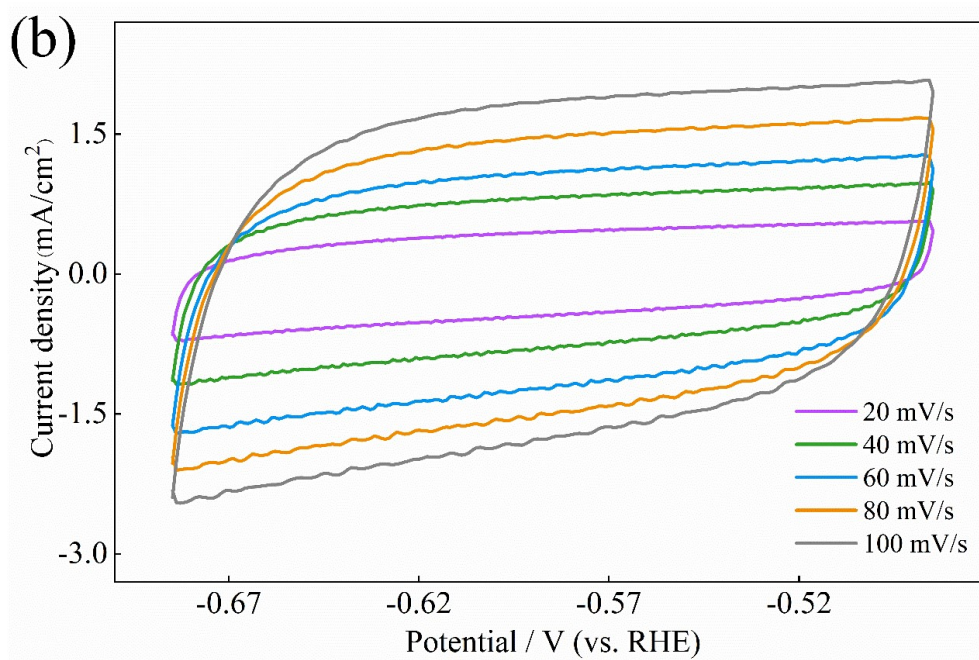

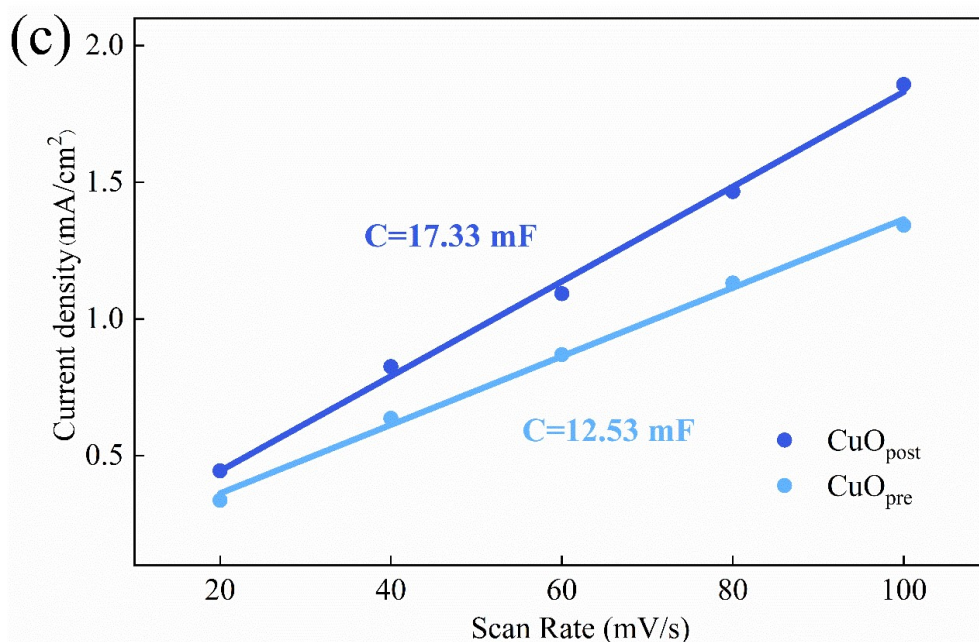

Supplementary Figure 9. Determination of double-layer capacitance for CuO catalysts before and after the reaction in 0.5 M KHCO<sub>3</sub>. The CVs of (a) CuO before the reaction and (b) CuO after the reaction taken over a range of scan rates in a potential window where only double-layer charging and discharging is relevant. (c) Current due to double-layer charge/discharge plotted against CV scan rate.

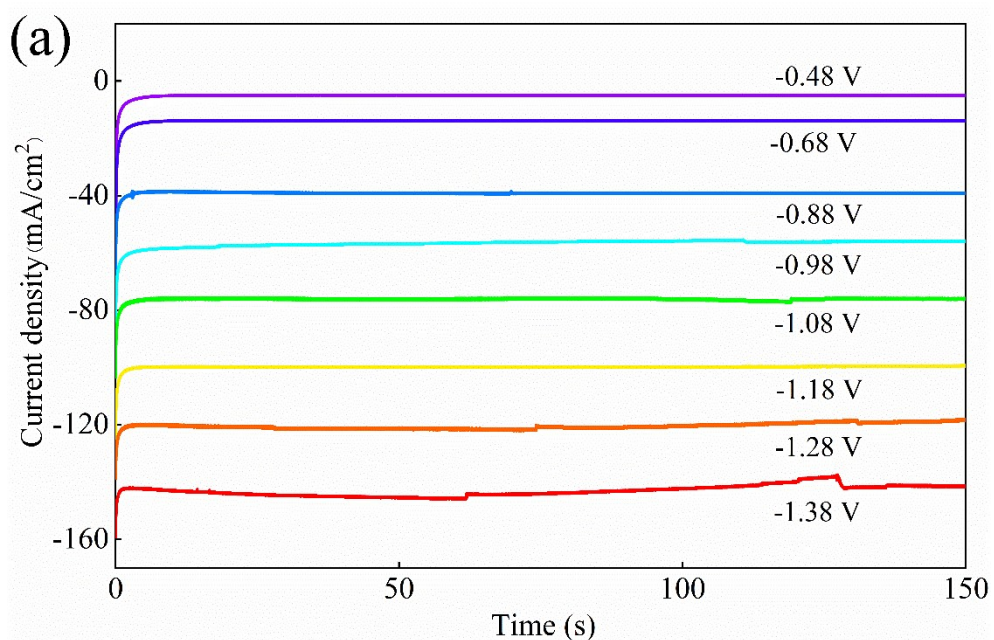



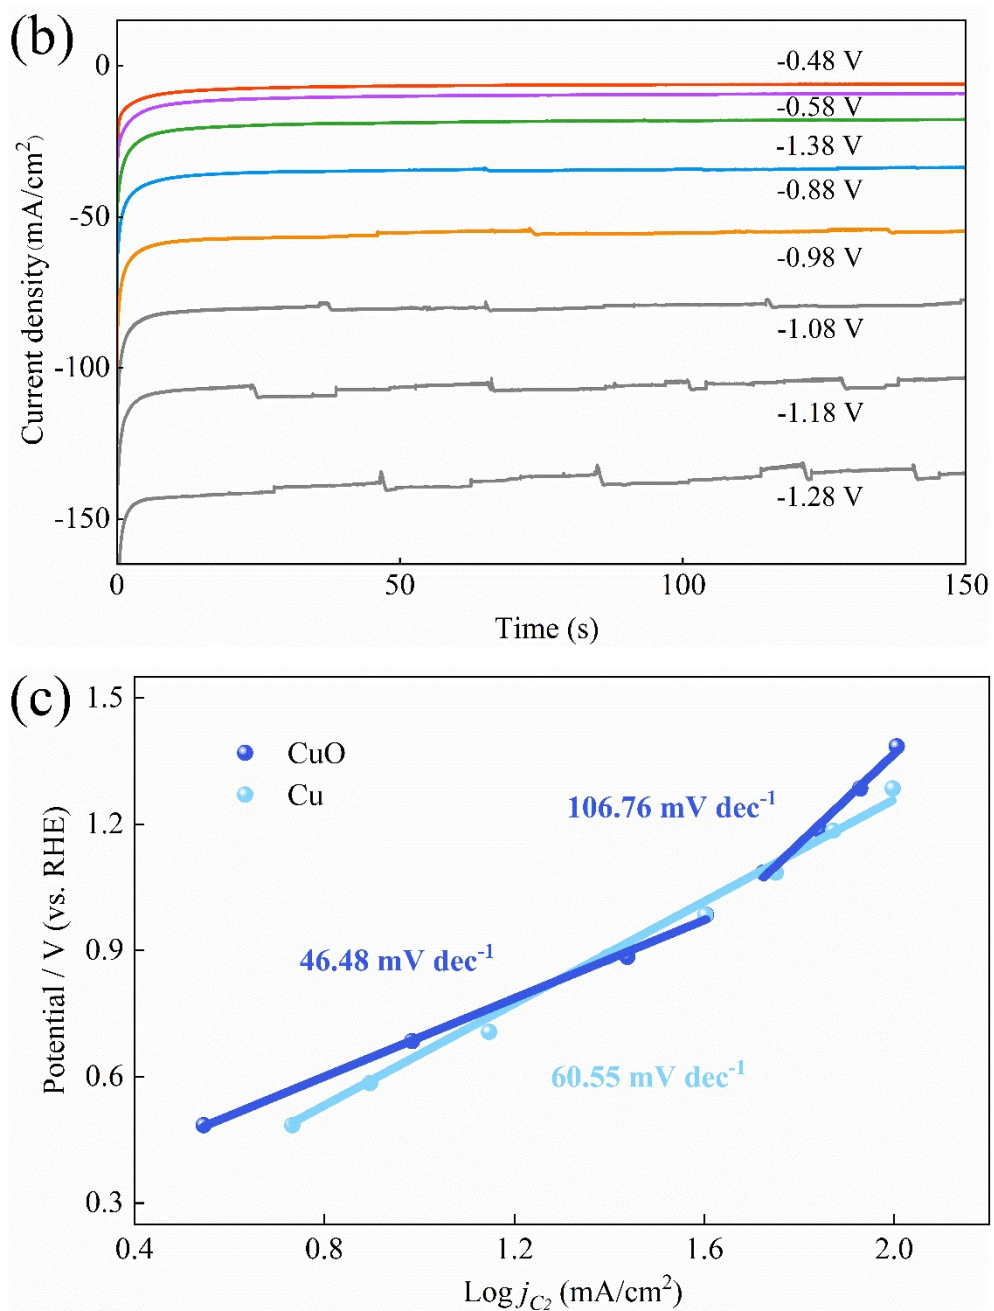

Supplementary Figure 10. CA responses of activity stabilized (a) CuO and (b) Cu catalysts in 0.01 M HCl and 2 M KCl in the catalytic turnover region. (c) True steady-state polarization curve (Tafel plot) constructed from CO<sub>2</sub>RR current densities sampled from steady-state CA responses.

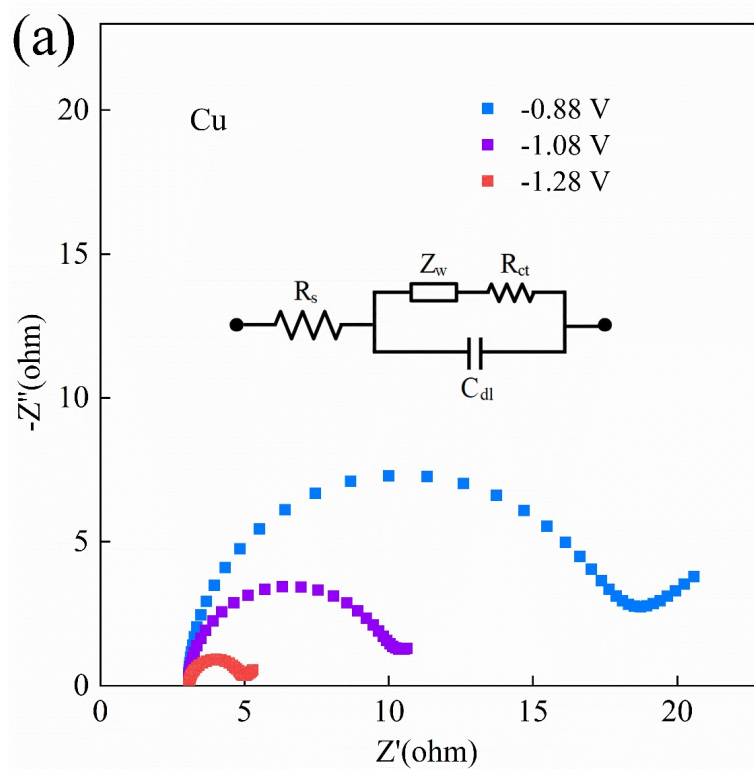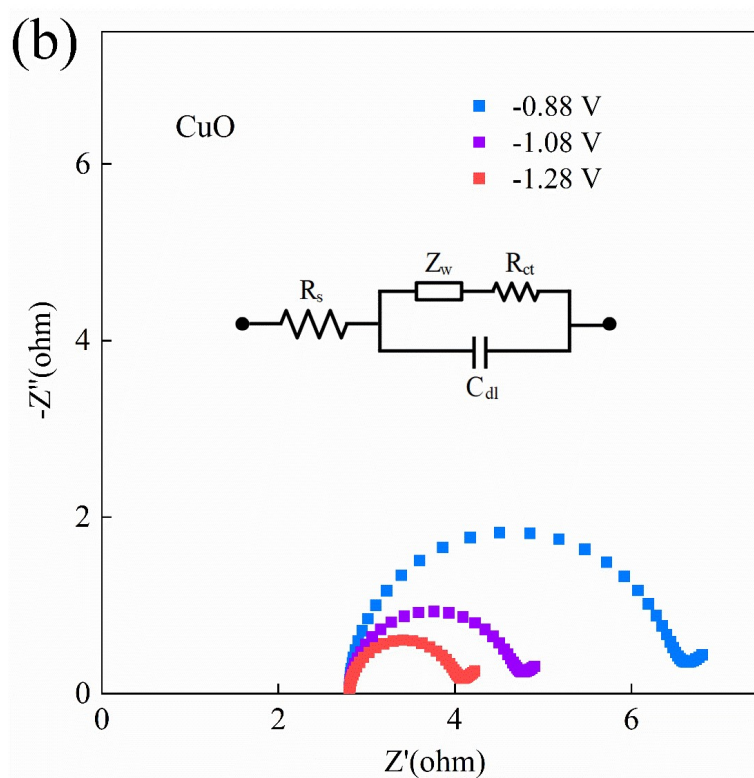

Supplementary Figure 11. Representative EIS measurements on (a) Cu and (b) CuO catalysts acquired at different potentials (reference electrode: Ag/AgCl; counter electrode: DSA; cell: floe cell; electrolyte: 0.01 M HCl and 2 M KCl).

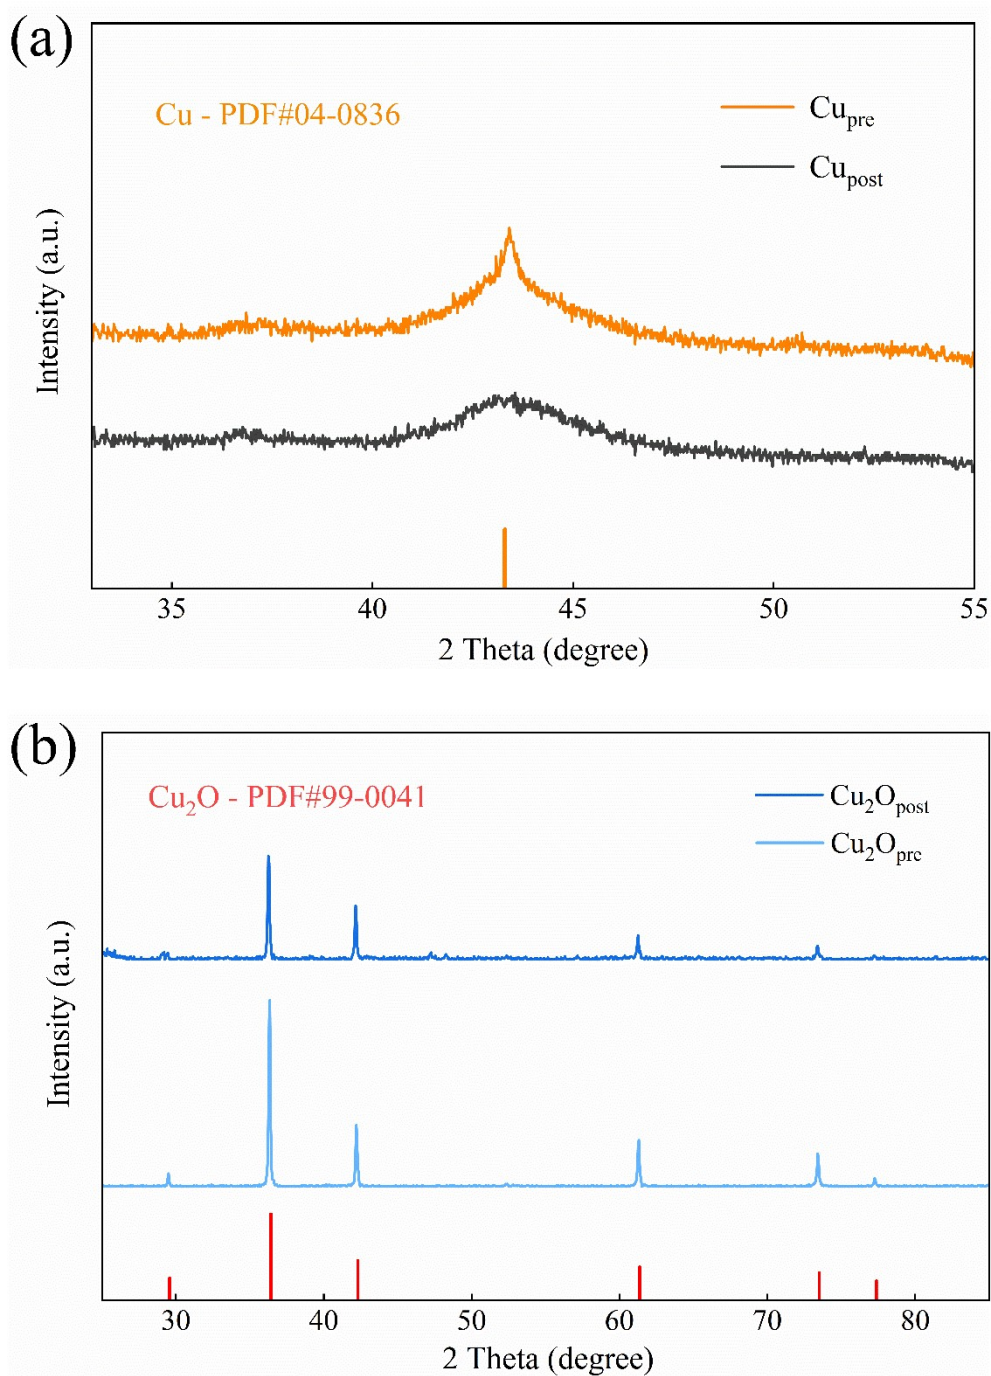

Supplementary Figure 12. XRD patterns of (a) Cu and (b) Cu<sub>2</sub>O catalysts over carbon cloth before and after the reaction. The standard power diffraction file (PDF) index of Cu (ICDD PDF# 04-0836) and Cu<sub>2</sub>O (ICDD PDF# 99-0041) are plotted for comparison.

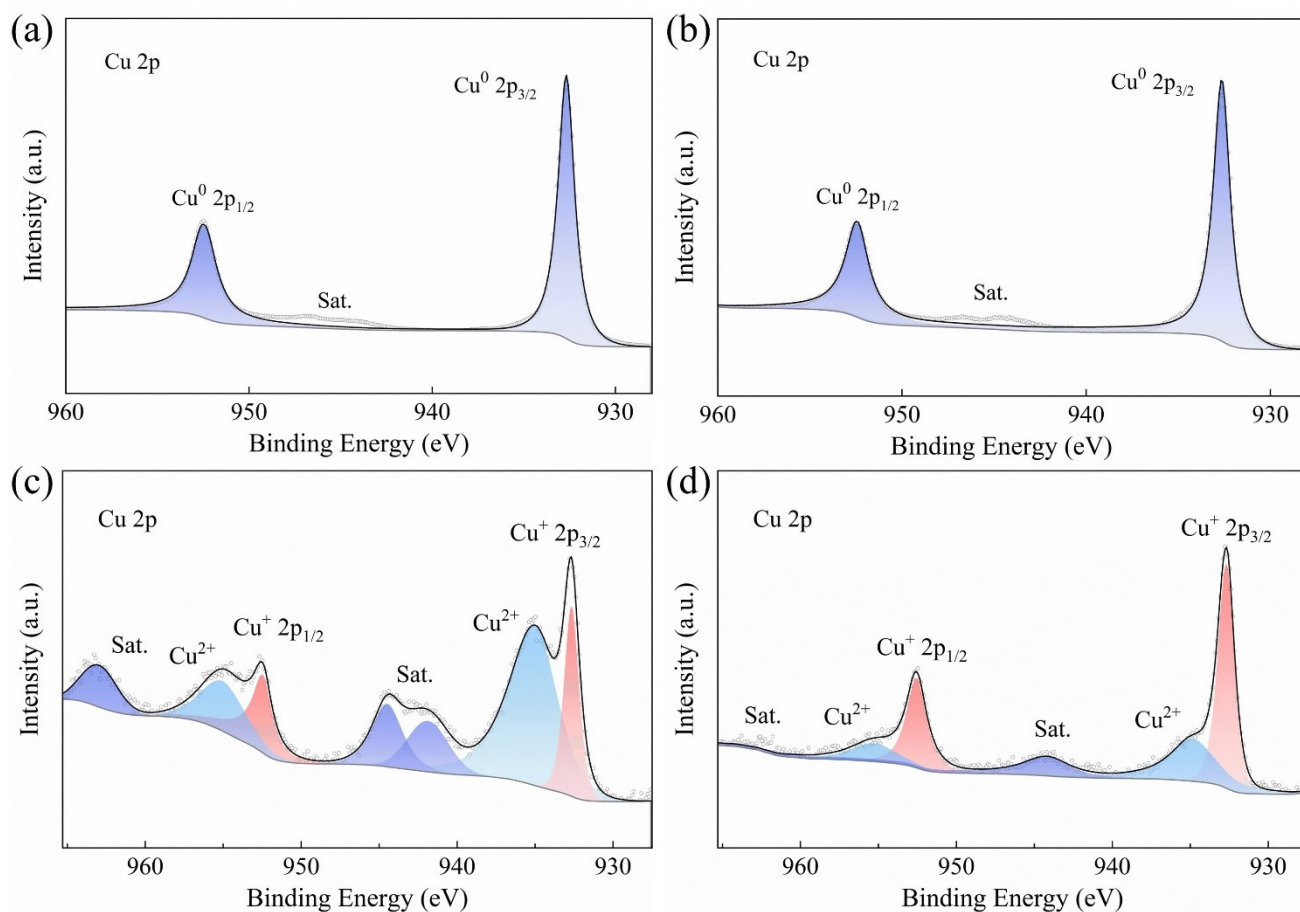

Supplementary Figure 13. XPS spectrum of the Cu catalysts (a) before and (b) after the CO<sub>2</sub>RR. XPS spectrum of the Cu<sub>2</sub>O catalysts (c) before and (d) after the CO<sub>2</sub>RR.
